# Supplementary material for: Proteome Analysis of the Soybean Nodule Phosphorus Response Mechanism and Characterization of Stress-Induced Ribosome Structural and Protein Expression Changes
Source: Front Plant Sci. 2022 Jun 9;13:908889. doi: 10.3389/fpls.2022.908889 (PMC9218819; doi:10.3389/fpls.2022.908889)
Supplement: Supplementary Table 3 — Amino acid and derivatives differences in root nodules under phosphorus stress. [file Table_3.XLSX]

## Sheet: file explanation
表头名称	描述
id	该物质在本次定性分析中的唯一数据编号
compound name	质谱定性匹配分析得到的物质名称
NAME_CH	物质中文名称
CAS	CAS编号
KEGG_ID	KEGG_ID数据库编号
FORMULA	分子式
EXACT_MASS	精确分子质量
CLASS_EN	物质英文分类
CLASS_CH	物质中文分类
Q1	该物质母离子质量数
Q3	该物质子离子质量数
ionmode	离子模式
rt	该物质的色谱保留时间
MEAN OO	该物质在该组对比内的一个实验组的相对定量值均值
MEAN XX	该物质在该组对比内的另一个实验组的相对定量值均值
VIP	该物质在该组对比的OPLS-DA模型得到的变量投影重要度
P-VALUE	该物质在该组对比的t检验得到的P值，P值 = 假设是正确但是被拒绝的概率 = 阴性结果个数/结果总个数，是对与样本数据的一个检验概率
Q-VALUE	假设检验统计量（P值）经多重假设检验校正之后的结果，Q值 = 被拒绝但却是正确的概率 = 假阳性结果个数/推测为阳性结果的个数，是对统计检验得到的推论的一种检验概率，对P值的再统计
FOLD CHANGE	该物质在该组对比两组实验间的倍数关系
LOG_FOLDCHANGE	FOLD CHANGE取以2为底的对数
	本次差异代谢物筛选条件为VIP大于1且P-value小于0.05

## Sheet: Sheet1
P1 vs P31
id	compound name	CAS	KEGG_ID	FORMULA	CLASS	P-VALUE	Q-VALUE	FOLD CHANGE	LOG_FOLDCHANGE
13	4-Aminobutyric acid	56-12-2	C00334	C4H9NO2	amino acids	7.52305e-05	0.00220933	0.480937	-1.05608
25	L-Tyrosine	60-18-4	C00082	C9H11NO3	amino acids	4.63132e-05	0.00163551	3.30162	1.72317
33	3-Methy-L-histidine	368-16-1	C01152	C7H11N3O2	amino acids	0.0139418	0.11066	1.36824	0.452321
77	L-Valine	72-18-4	C00183	C5H11NO2	Amino acid and derivatives;amino acids	0.000825216	0.0120056	1.58545	0.664896
78	L-Threonine	72-19-5	C00188	C4H9NO3	Amino acid and derivatives;amino acids	0.000316198	0.00569668	1.52106	0.605072
79	Proline;L-Proline	147-85-3	C00148	C5H9NO2	Amino acid and derivatives;amino acids	0.000808898	0.0118317	1.386	0.470927
80	L-Serine	56-45-1	C00065	C3H7NO3	Amino acid and derivatives;amino acids	1.99823e-06	0.000151988	0.734629	-0.444911
82	L-Arginine	74-79-3	C00062	C6H14N4O2	Amino acid and derivatives;amino acids	1.85066e-07	3.34489e-05	29.4911	4.88221
83	L-Asparagine	70-47-3	C00152	C4H8N2O3	Amino acid and derivatives;amino acids	1.81917e-08	8.99396e-06	8.82225	3.14115
84	L-Ornithine	70-26-8	C01602;C00077	C5H12N2O2	Amino acid and derivatives;amino acids	2.70458e-05	0.00113067	6.52963	2.707
85	L-Aspartic acid	56-84-8	C00049	C4H7NO4	Amino acid and derivatives;amino acids	5.86041e-05	0.00190061	1.43598	0.522038
87	L-Citruline;L-Citrulline	372-75-8	C00327	C6H13N3O3	Amino acid and derivatives;amino acids	0.000490467	0.00802514	4.00435	2.00157
88	L-Glutamic acid	56-86-0	C00025	C5H9NO4	Amino acid and derivatives;amino acids	0.00498198	0.0528432	0.826949	-0.274129
90	L-Histidine	71-00-1	C00135	C6H9N3O2	Amino acid and derivatives;amino acids	3.54748e-07	3.89748e-05	8.00722	3.0013
93	DL-Alanine;L-Alanine	302-72-7;56-41-7	C01401;C00041	C3H7NO2	Alkaloids;Amino acid and derivatives;amino acids	0.000916305	0.0129434	0.689333	-0.536727
95	Tryptophan;L-Tryptophan;D-Tryptophan	54-12-6;73-22-3;153-94-6	C00806;C00078;C00525	C11H12N2O2	Alkaloids;Amino acid and derivatives;Indoles and derivatives;amino acids	1.52934e-05	0.000720097	4.11299	2.04019
184	Tyramine	51-67-2	C00483	C8H11NO	Amino acid and derivatives	0.0400238	0.209732	0.611332	-0.709973
211	DL-Norvaline	6600-40-4	C01826	C5H11NO2	Amino acid and derivatives	0.00113134	0.0155655	1.61762	0.693873
212	5-Aminovaleric acid	660-88-8	C00431	C5H11NO2	Amino acid and derivatives	0.00759999	0.0726232	1.86069	0.895838
296	CYS-GLY;Cysteinylglycine	19246-18-5	C01419	C5H10N2O3S	Amino acid and derivatives	9.73262e-06	0.000526826	0.294722	-1.76257
586	L-Ornithine	3184-13-2;70-26-8	C00077;C01602	C5H12N2O2	Amino acid and derivatives	0.0112743	0.0954564	2.11318	1.07942
732	Glutathione	70-18-8	C00051	C10H17N3O6S	Amino acid and derivatives	0.00457444	0.0496084	0.117417	-3.09029
760	L-Pipecolic acid	535-75-1;3105-95-1	C00408	C6H11NO2	Amino acid and derivatives	0.000201324	0.00424821	0.749164	-0.416647
902	N-Glycyl-L-leucine	869-19-2	C02155	C8H16N2O3	Amino acid and derivatives	0.0286046	0.171217	0.792952	-0.334695
1053	L-Kynurenine	343-65-7;2922-83-0	C00328;C01718	C10H12N2O3	Amino acid and derivatives	0.00622947	0.0625265	7.81133	2.96557
1230	L-Norleucine	327-57-1	C01933	C6H13NO2	Amino acid and derivatives	0.00322582	0.037787	2.4151	1.27208
1231	Isoleucine	443-79-8	C16434;C06418	C6H13NO2	Amino acid and derivatives	0.00040643	0.00688794	2.49767	1.32058
1316	L-Homoserine	1927-25-9;672-15-1;6027-21-0	C00263	C4H9NO3	Amino acid and derivatives	0.000316198	0.00569668	1.52106	0.605072
1359	L-Isoleucine;L-Leucine	73-32-5;61-90-5	C00407;C00123	C6H13NO2	Amino acid and derivatives	9.14213e-06	0.000505465	2.2144	1.14692
P11 vs P31
id	compound name	CAS	KEGG_ID	FORMULA	CLASS	P-VALUE	Q-VALUE	FOLD CHANGE	LOG_FOLDCHANGE
13	4-Aminobutyric acid	56-12-2	C00334	C4H9NO2	amino acids	0.00179559	0.0272856	0.641512	-0.640452
25	L-Tyrosine	60-18-4	C00082	C9H11NO3	amino acids	3.89144e-07	9.11147e-05	3.13303	1.64756
32	1-Methy-L-histidine	332-80-9	C01152	C7H11N3O2	amino acids	0.00421341	0.048132	1.31115	0.390837
33	3-Methy-L-histidine	368-16-1	C01152	C7H11N3O2	amino acids	0.00141689	0.0234358	1.65343	0.725462
77	L-Valine	72-18-4	C00183	C5H11NO2	Amino acid and derivatives;amino acids	0.000991777	0.018213	1.4543	0.54032
78	L-Threonine	72-19-5	C00188	C4H9NO3	Amino acid and derivatives;amino acids	6.74117e-05	0.00249769	1.49282	0.578036
82	L-Arginine	74-79-3	C00062	C6H14N4O2	Amino acid and derivatives;amino acids	2.26532e-06	0.000212162	25.9359	4.69688
83	L-Asparagine	70-47-3	C00152	C4H8N2O3	Amino acid and derivatives;amino acids	5.28694e-07	9.90315e-05	7.25007	2.858
84	L-Ornithine	70-26-8	C01602;C00077	C5H12N2O2	Amino acid and derivatives;amino acids	0.000120382	0.00356521	5.84496	2.54719
85	L-Aspartic acid	56-84-8	C00049	C4H7NO4	Amino acid and derivatives;amino acids	6.47422e-06	0.00043311	2.02765	1.01981
87	L-Citruline;L-Citrulline	372-75-8	C00327	C6H13N3O3	Amino acid and derivatives;amino acids	1.15125e-05	0.00066388	4.50434	2.17132
89	Glycine	56-40-6	C00037	C2H5NO2	Alkaloids;amino acids	0.00174099	0.0267697	1.42551	0.51148
90	L-Histidine	71-00-1	C00135	C6H9N3O2	Amino acid and derivatives;amino acids	1.32182e-05	0.000728219	5.89731	2.56006
93	DL-Alanine;L-Alanine	302-72-7;56-41-7	C01401;C00041	C3H7NO2	Alkaloids;Amino acid and derivatives;amino acids	0.00703736	0.0663782	0.787212	-0.345176
95	Tryptophan;L-Tryptophan;D-Tryptophan	54-12-6;73-22-3;153-94-6	C00806;C00078;C00525	C11H12N2O2	Alkaloids;Amino acid and derivatives;Indoles and derivatives;amino acids	1.90181e-06	0.000195552	2.54272	1.34637
96	L-Phenylalanine;D-(+)-Phenylalanine;DL-Phenylalanine	63-91-2;673-06-3;150-30-1	C00079;C02265;C02057	C9H11NO2	Amino acid and derivatives;Phenols;amino acids	2.47322e-05	0.00121913	1.58233	0.662048
211	DL-Norvaline	6600-40-4	C01826	C5H11NO2	Amino acid and derivatives	0.000247436	0.00641878	1.81674	0.861351
212	5-Aminovaleric acid	660-88-8	C00431	C5H11NO2	Amino acid and derivatives	0.000195293	0.00522585	1.71101	0.774848
213	Guanidineacetic acid	352-97-6	C00581	C3H7N3O2	Amino acid and derivatives	0.00249264	0.0341952	1.43615	0.52221
296	CYS-GLY;Cysteinylglycine	19246-18-5	C01419	C5H10N2O3S	Amino acid and derivatives	0.00160538	0.0254335	0.482919	-1.05015
648	N-formylmethionine	4289-98-9	C03145	C6H11NO3S	Amino acid and derivatives	0.00780532	0.0702904	1.32655	0.407675
732	Glutathione	70-18-8	C00051	C10H17N3O6S	Amino acid and derivatives	0.0281997	0.161599	0.436669	-1.19539
905	N6-Acetyl-L-lysine	692-04-6	C02727	C8H16N2O3	Amino acid and derivatives	0.00739628	0.0682518	0.720905	-0.472119
964	L-Cysteine	52-90-4	C00097	C3H7NO2S	Amino acid and derivatives	0.0108885	0.0867341	1.66442	0.735024
1053	L-Kynurenine	343-65-7;2922-83-0	C00328;C01718	C10H12N2O3	Amino acid and derivatives	0.00273218	0.0364267	7.19725	2.84745
1316	L-Homoserine	1927-25-9;672-15-1;6027-21-0	C00263	C4H9NO3	Amino acid and derivatives	6.74117e-05	0.00249769	1.49282	0.578036
